# Supplementary material for: Bacteremia Antibiotic Length Actually Needed for Clinical Effectiveness (BALANCE): study protocol for a pilot randomized controlled trial
Source: PubMed Central journal article supplement (PMC4407544; doi:10.1186/s13063-015-0688-z), 2015-04-18
Supplement: 13063_2015_688_MOESM1_ESM.pdf [file 13063_2015_688_MOESM1_ESM.pdf]

Sample size calculation

| Non-Inferiority Margin | Baseline mortality† | Alpha*       | Power      | Sample Size Per Arm |
|------------------------|---------------------|--------------|------------|---------------------|
| -1%                    | 27%                 | 0.025        | 90%        | 41421               |
| -1%                    | 27%                 | 0.025        | 80%        | 30941               |
| -1%                    | 27%                 | 0.050        | 90%        | 33759               |
| -1%                    | 27%                 | 0.050        | 80%        | 24372               |
| -2%                    | 27%                 | 0.025        | 90%        | 10356               |
| -2%                    | 27%                 | 0.025        | 80%        | 7736                |
| -2%                    | 27%                 | 0.050        | 90%        | 8440                |
| -2%                    | 27%                 | 0.050        | 80%        | 6094                |
| -3%                    | 27%                 | 0.025        | 90%        | 4603                |
| -3%                    | 27%                 | 0.025        | 80%        | 3439                |
| -3%                    | 27%                 | 0.050        | 90%        | 3752                |
| -3%                    | 27%                 | 0.050        | 80%        | 2709                |
| -4%                    | 27%                 | 0.025        | 90%        | 2589                |
| <b>-4%</b>             | <b>27%</b>          | <b>0.025</b> | <b>80%</b> | <b>1934</b>         |
| -4%                    | 27%                 | 0.050        | 90%        | 2111                |
| -4%                    | 27%                 | 0.050        | 80%        | 1524                |
| -5%                    | 27%                 | 0.025        | 90%        | 1658                |
| -5%                    | 27%                 | 0.025        | 80%        | 1238                |
| -5%                    | 27%                 | 0.050        | 90%        | 1351                |
| -5%                    | 27%                 | 0.050        | 80%        | 975                 |

Participating sites

| <u>Site Investigator</u> | <u>Infectious Disease Specialist</u> | <u>Site Coordinator</u> | <u>Hospital</u>                                                |
|--------------------------|--------------------------------------|-------------------------|----------------------------------------------------------------|
| Nick Daneman, MD**       | Nick Daneman, MD                     | Asgar Rishu             | Sunnybrook Health Sciences, Toronto, ON                        |
| Rob Fowler, MD**         |                                      |                         |                                                                |
| Sean Bagshaw, MD         | Wendy Sligl, MD                      | Samantha Taylor         | University of Alberta Hospital, Edmonton, AB                   |
| Peter Dodek, MD          | Victor Leung, MD                     | Betty Jean Ashley       | St. Paul's Hospital, Vancouver, BC                             |
| Rick Hall, MD            | Lynn Johnston, MD                    | Lisa Julien             | Queen Elizabeth II Halifax, NS                                 |
| Anand Kumar, MD          | Anand Kumar, MD                      | Wendy Janz              | St. Boniface Hospital, Winnipeg, MB                            |
| François Lamontagne, MD  | Alex Carignan, MD                    | Chantal Langevin        | Université de Sherbrooke, Sherbrooke, QC                       |
| François Lauzier, MD     | Julie Bestman-Smith, MD              | France-Emilie Roy       | Centre hospitalier affilié universitaire de Québec, Québec, QC |
| John Marshall, MD        | Linda Taggart, MD                    | Orla Smith              | St. Michael's Hospital, Toronto, ON                            |
| Claudio Martin, MD       | Sameer El Sayed, MD                  | Eileen Campbell         | London Health Sciences Centre, London, ON                      |
| Lauralyn McIntyre, MD    | Baldwin Toye, MD                     | Irene Watpool           | The Ottawa Hospital, Ottawa, ON                                |
| John Muscedere, MD       | To Be Determined, MD                 | Susan Fleury            | Kingston General Hospital, Kingston, ON                        |
| Steven Reynolds, MD      | Steve Reynolds, MD                   | Suzette Willems         | Royal Columbian Hospital, Vancouver, BC                        |
| Tom Stelfox, MD          | John Conly, MD                       | Dan Lane                | Foothills Hospital, Calgary, AB                                |
